# Supplementary material for: MyD88 Deficiency Alters Expression of Antimicrobial Factors in Mouse Salivary Glands
Source: PubMed Central journal article supplement (PMC4240645; doi:10.1371/journal.pone.0113333), 2014-11-21
Supplement: pone.0113333.s001.pdf [file pone.0113333.s001.pdf]

# Figure S1

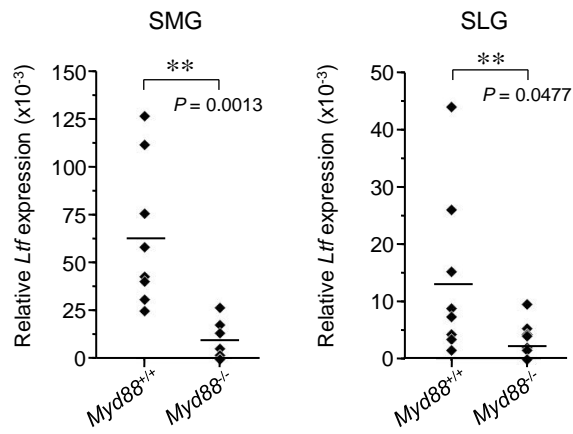

**Figure S1. qRT-PCR analysis for *Ltf* expression in SGs.**

Total RNA was prepared separately from SMGs and SLGs collected from *Myd88*<sup>+/+</sup> mice and *Myd88*<sup>-/-</sup> mice at 10 weeks old (n=8 each). Each expression level of *Ltf* was calculated relative to expression of the *Hprt1* housekeeping gene. Means of each group were shown and *P* values were calculated by unpaired Student's *t*-test. \*\*, *P* < 0.01.
