# Supplementary material for: MyD88 Deficiency Alters Expression of Antimicrobial Factors in Mouse Salivary Glands
Source: PubMed Central journal article supplement (PMC4240645; doi:10.1371/journal.pone.0113333), 2014-11-21
Supplement: pone.0113333.s003.pdf [file pone.0113333.s003.pdf]

# Figure S3

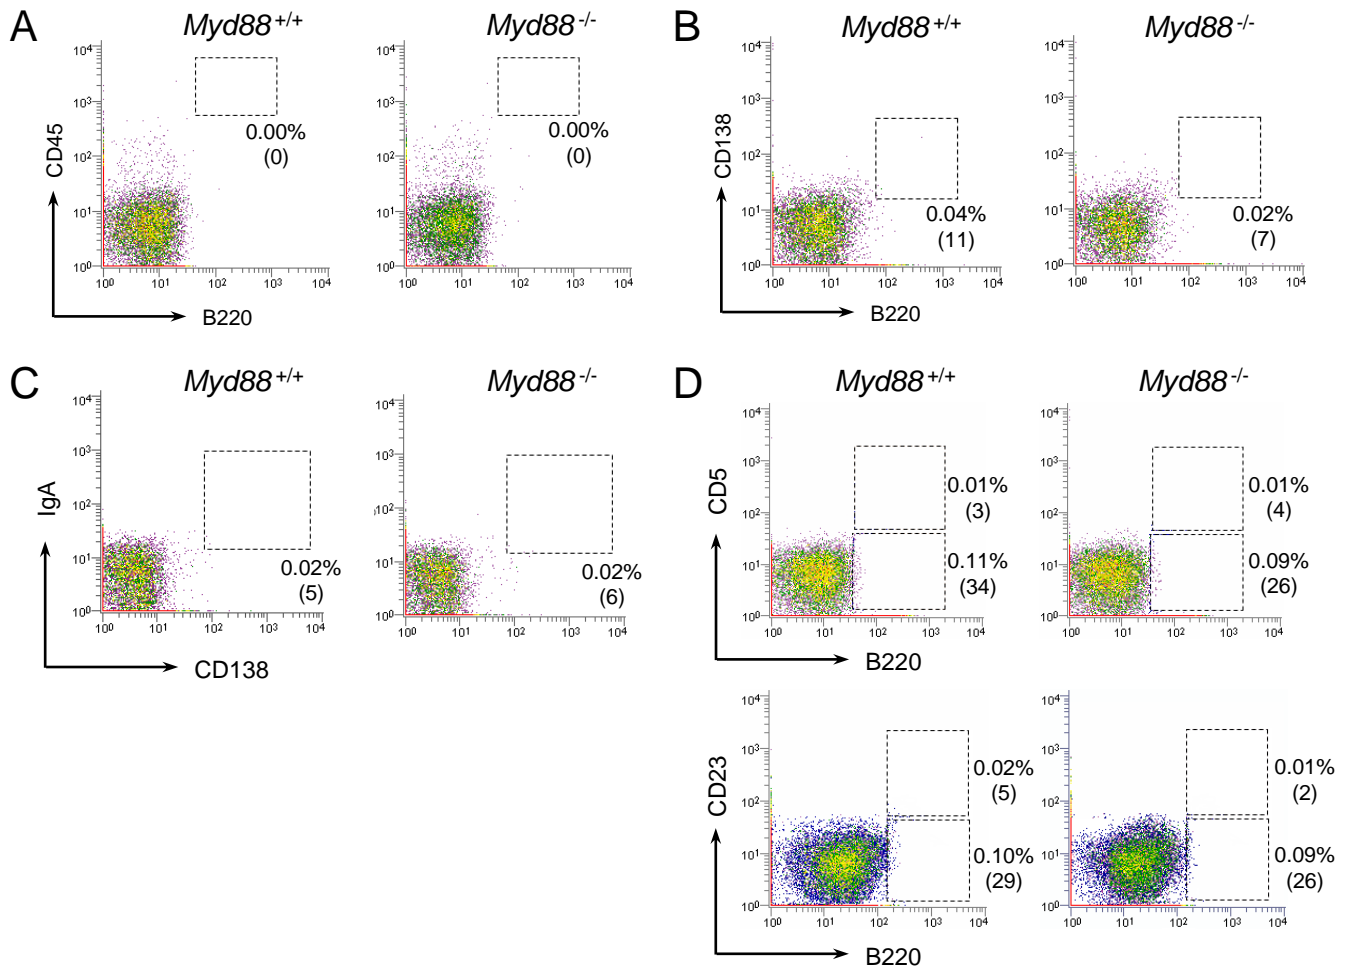

## Figure S3. Flow cytometric analysis of SMG cells stained with isotype control antibody.

Flow cytometry was performed on cells prepared from SMGs from *Myd88*<sup>+/+</sup> mice (left) and *Myd88*<sup>-/-</sup> mice (right) at 10 weeks old. In the dot plots, the percentage and cell number within the outlined area are shown. Data are representative of three independent experiments.

A: Analysis of SMG cells stained with FITC-labeled rat IgG2b isotype control antibody and PerCP-labeled rat IgG2a isotype control antibody (30,000 cells each).

B: Analysis of SMG cells stained with PE/Cy7-labeled rat IgG2a isotype control antibody and PerCP-labeled rat IgG2a isotype control antibody (30,000 cells each).

C: Analysis of SMG cells stained with PE/Cy5-labeled rat IgG2a isotype control antibody and PerCP-labeled rat IgG2a isotype control antibody (30,000 cells each).

D: Analysis of SMG cells stained with PE-labeled rat IgG2a isotype control antibody, PE/Cy7-labeled rat IgG2a isotype control antibody, and PerCP-labeled rat IgG2a isotype control antibody (30,000 cells each).
