# Supplementary material for: MyD88 Deficiency Alters Expression of Antimicrobial Factors in Mouse Salivary Glands
Source: PubMed Central journal article supplement (PMC4240645; doi:10.1371/journal.pone.0113333), 2014-11-21
Supplement: pone.0113333.s005.pdf [file pone.0113333.s005.pdf]

# Figure S5

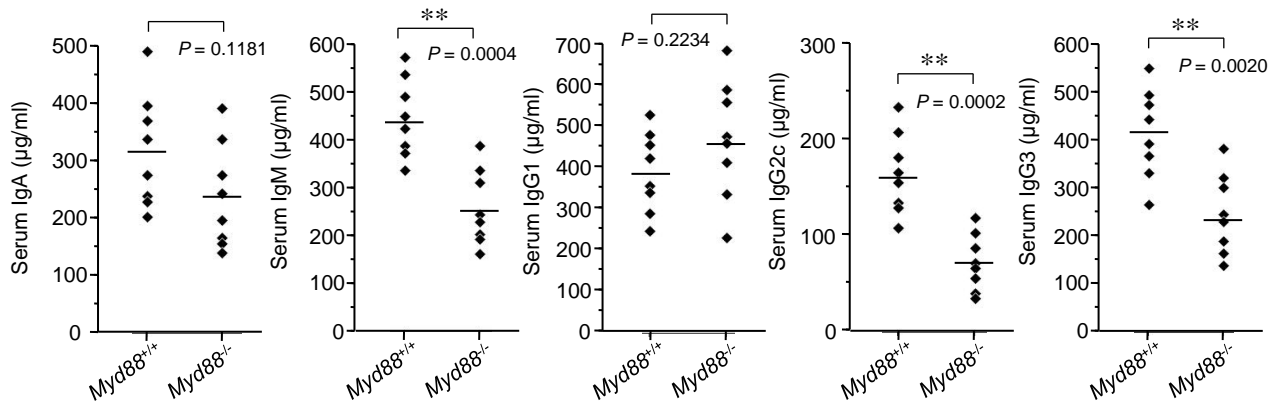

**Figure S5. Effect of MyD88 deficiency on the levels of serum basal Igs.**

Sera were collected from *Myd88*<sup>+/+</sup> mice and *Myd88*<sup>-/-</sup> mice at 10 weeks old (n=8 each) for determination of basal Ig levels by ELISA. Means of each group were shown and P values were calculated by unpaired Student's *t*-test. \*\*,  $P < 0.01$ .
