# Supplementary material for: MyD88 Deficiency Alters Expression of Antimicrobial Factors in Mouse Salivary Glands
Source: PubMed Central journal article supplement (PMC4240645; doi:10.1371/journal.pone.0113333), 2014-11-21
Supplement: pone.0113333.s006.pdf [file pone.0113333.s006.pdf]

# Figure S6

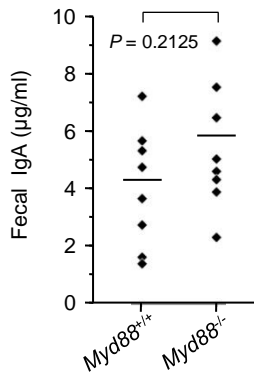

## Figure S6. Effect of MyD88 deficiency on intestinal IgA production.

Fecal extracts were prepared from fecal pellets collected from *Myd88*<sup>+/+</sup> mice and *Myd88*<sup>-/-</sup> mice at 10 weeks old (n=8 each) for determination of intestinal basal IgA levels by ELISA. Means of each group were shown and *P* value was calculated by unpaired Student's *t*-test.
