# Supplementary material for: MyD88 Deficiency Alters Expression of Antimicrobial Factors in Mouse Salivary Glands
Source: PubMed Central journal article supplement (PMC4240645; doi:10.1371/journal.pone.0113333), 2014-11-21
Supplement: pone.0113333.s007.pdf [file pone.0113333.s007.pdf]

Table S1

Primer sets used in qRT-PCR analysis

| Gene          | Primer sequence (5' - 3')                                                                                                                                                                                                  |                           |
|---------------|----------------------------------------------------------------------------------------------------------------------------------------------------------------------------------------------------------------------------|---------------------------|
| <i>Defa1</i>  | F                                                                                                                                                                                                                          | AGGTGACTCGCAGCCATGAA      |
|               | R                                                                                                                                                                                                                          | ATAGAATCAGCCTGGACCTGGAAG  |
| <i>Defb1</i>  | F                                                                                                                                                                                                                          | AGCCTCATCTGTGAGCCCAACTA   |
|               | R                                                                                                                                                                                                                          | TCCAAGACTTGTGAGAATGCCAAC  |
| <i>S100a8</i> | Please see: RT <sup>2</sup> qPCR Primer Assay for Mouse <i>S100a8</i> (PPM05051F)<br><a href="http://www.sabiosciences.com/primerinfo.php?pcatn=PPM05051F">http://www.sabiosciences.com/primerinfo.php?pcatn=PPM05051F</a> |                           |
| <i>S100a9</i> | F                                                                                                                                                                                                                          | CCCTGACACCCTGAGCAAGA      |
|               | R                                                                                                                                                                                                                          | TTCTCATGACAGGCAAAGATCAAC  |
| <i>Ltf</i>    | F                                                                                                                                                                                                                          | CCTGCTTGCTAACCAGACCAGA    |
|               | R                                                                                                                                                                                                                          | TCACCAATACACAGGGCACAGAG   |
| <i>Hprt</i>   | F                                                                                                                                                                                                                          | TTGTTGTTGGATATGCCCTTGACTA |
|               | R                                                                                                                                                                                                                          | AGGCAGATGGCCACAGGACTA     |
