# Supplementary material for: MyD88 Deficiency Alters Expression of Antimicrobial Factors in Mouse Salivary Glands
Source: PubMed Central journal article supplement (PMC4240645; doi:10.1371/journal.pone.0113333), 2014-11-21
Supplement: pone.0113333.s008.pdf [file pone.0113333.s008.pdf]

Table S2

| Gene Name        | Description                                                  | Analogous gene in humans |
|------------------|--------------------------------------------------------------|--------------------------|
| <i>Adm</i>       | adrenomedullin                                               | <i>ADM</i>               |
| <i>B2m</i>       | beta-2 microglobulin                                         | <i>B2M</i>               |
| <i>Bpi</i>       | bactericidal permeability increasing protein (BPI)           | <i>BPI</i>               |
| <i>Bpifa1</i>    | BPI fold containing family A, member 1                       | <i>PLUNC</i>             |
| <i>Bpifb1</i>    | BPI fold containing family B, member 1                       | <i>LPLUNC1</i>           |
| <i>Bpifb2</i>    | BPI fold containing family B, member 2                       | <i>BPIL1</i>             |
| <i>Calca</i>     | Calca calcitonin/calcitonin-related polypeptide, alpha       | <i>CALCA</i>             |
| <i>Camp</i>      | cathelicidin antimicrobial peptide (LL-37)                   | <i>CAMP</i>              |
| <i>Ccl28</i>     | chemokine (C-C motif) ligand 28                              | <i>CCL28</i>             |
| <i>Csta1</i>     | cystatin A1                                                  | <i>CSTA</i>              |
| <i>Cstb</i>      | cystatin B                                                   | <i>CSTB</i>              |
| <i>Cst3</i>      | cystatin C                                                   | <i>CST3</i>              |
| <i>Defa1</i>     | defensin, alpha 1                                            | <i>DEFA1</i>             |
| <i>Defa3</i>     | defensin, alpha 3                                            | <i>DEFA3</i>             |
| <i>Defa4</i>     | defensin, alpha 4                                            | <i>DEFA4</i>             |
| <i>Defb1</i>     | defensin, beta 1                                             | <i>DEFB1</i>             |
| <i>Defb2</i>     | defensin, beta 2                                             | <i>DEFB4A</i>            |
| <i>Defb3</i>     | defensin, beta 3                                             | <i>DEFB103A</i>          |
| <i>Defb4</i>     | defensin, beta 4                                             | <i>DEFB4B</i>            |
| <i>Dmbt1</i>     | deleted in malignant brain tumors 1                          | <i>DMBT1</i>             |
| <i>Fn1</i>       | fibronectin 1                                                | <i>FNI</i>               |
| <i>Fgf1</i>      | fibroblast growth factor 1                                   | <i>FGF1</i>              |
| <i>Fgf2</i>      | fibroblast growth factor 2                                   | <i>FGF2</i>              |
| <i>Lpo</i>       | lactoperoxidase                                              | <i>LPO</i>               |
| <i>Ltf</i>       | lactotransferrin                                             | <i>LTF</i>               |
| <i>Lyz1</i>      | lysozyme 1                                                   | <i>LYZ</i>               |
| <i>Lyz2</i>      | lysozyme 2                                                   | <i>LYZ</i>               |
| <i>Mpo</i>       | myeloperoxidase                                              | <i>MPO</i>               |
| <i>Npy</i>       | neuropeptide Y                                               | <i>NPY</i>               |
| <i>Pglyrp1</i>   | peptidoglycan recognition protein 1                          | <i>PGLYRP1</i>           |
| <i>Pglyrp2</i>   | peptidoglycan recognition protein 2                          | <i>PGLYRP2</i>           |
| <i>Pglyrp3</i>   | peptidoglycan recognition protein 3                          | <i>PGLYRP3</i>           |
| <i>Pglyrp4</i>   | peptidoglycan recognition protein 1                          | <i>PGLYRP4</i>           |
| <i>Pip</i>       | prolactin induced protein                                    | <i>PIP</i>               |
| <i>Prb1</i>      | proline-rich protein BstNI subfamily 1                       | <i>PRB1</i>              |
| <i>Prh1</i>      | proline rich protein HaeIII subfamily 1                      | <i>PRH1</i>              |
| <i>S100a7a</i>   | S100 calcium binding protein A7A                             | <i>S100A7</i>            |
| <i>S100a8</i>    | S100 calcium binding protein A8 (calgranulin A)              | <i>S100A8</i>            |
| <i>S100a9</i>    | S100 calcium binding protein A9 (calgranulin B)              | <i>S100A9</i>            |
| <i>Serpina1c</i> | serine (or cysteine) peptidase inhibitor, clade A, member 1C | <i>PI3</i>               |
| <i>Sftpa1</i>    | surfactant associated protein A1                             | <i>SFTPA1</i>            |
| <i>Slpi</i>      | secretory leukocyte peptidase inhibitor                      | <i>SLPI</i>              |
| <i>Tac1</i>      | tachykinin 1 (Substance P)                                   | <i>TAC1</i>              |
| <i>Trf</i>       | transferrin                                                  | <i>TF</i>                |
| <i>Vip</i>       | vasoactive intestinal polypeptide                            | <i>VIP</i>               |
